# Supplementary material for: New Discovery of Left Atrial Macroreentry Tachycardia: Originating from the Spontaneous Scarring of Left Atrial Anterior Wall
Source: J Interv Cardiol. 2021 Dec 15;2021:2829070. doi: 10.1155/2021/2829070 (PMC8694995; doi:10.1155/2021/2829070)
Supplement: Supplementary Materials — The Supplementary Material include Supplemental Method 1, Surface ECG of patients, Video 1, and Video 2. [file 2829070.f1.zip]

Archive with 3 entries (3 files):
- 2829070.f1.docx
- Supplementary Video 1.mp4
- Supplementary Video 2.mp4
